# Supplementary material for: General aggregation-induced deposition approach for creating asymmetric single-atom catalysts
Source: Royal Society of Chemistry journal article supplement (doi:10.1039/d4cc06650b), 2025-01-01
Supplement: d4cc06650b1.pdf [file d4cc06650b1.pdf]

# Electronic Supplementary Information

## **General aggregation-induced deposition approach for creating asymmetric single-atom catalysts**

Yutong Liao, Yingjie Chang, Yanqing Wang\* and Qi Li\*

Dr. Q. Li, Y. Liao, Y. Chang, Dr. Y. Wang

Department of Materials Science, School of Chemistry and Chemical Engineering, Nantong  
University, Nantong, 226019 Jiangsu, P. R. China

## Experimental Section

### *Chemicals and Reagents*

Styrene and pyrrole monomers were purified by filtration through neutral alumina prior to use. Histidine (His), potassium persulfate (KPS), ammonium persulfate (APS), and sodium dodecyl sulfate (SDS) were obtained from Aladdin Chemistry Co., Ltd. Commercial Pt/C (20 wt% Pt) was sourced from Alfa Aesar. Deionized (DI) water ( $>18.2 \text{ M}\Omega\cdot\text{cm}$ ) was produced using a Millipore Ultrapure water system. All reagents were employed as received without additional purification.

### *Catalyst preparation*

#### *Synthesis Procedures*

Preparation of polystyrene (PS) template:

A solution containing anhydrous  $\text{Na}_2\text{CO}_3$  (0.1 g, 0.94 mmol) and SDS (0.2 g, 0.69 mmol) in 300 mL DI water was stirred under  $\text{N}_2$  purge for 30 min. Styrene monomer (30 mL) was injected into the mixture and vigorously stirred at  $60^\circ\text{C}$  for 30 min, followed by dropwise addition of KPS aqueous solution (10 mL, 1 mmol). The reaction proceeded at  $70^\circ\text{C}$  for 20 h. The resulting PS nanoparticles were centrifuged (12,000 rpm, 30 min), washed repeatedly with DI water, and redispersed in 100 mL DI water to form the PS mother solution.

Fabrication of Co precursors:

PS mother solution (2 mL),  $\text{Co}(\text{NO}_3)_2\cdot 6\text{H}_2\text{O}$  solution (0.5 M, 5 mL), histidine solution (0.5 M, 20 mL), and pyrrole monomer (30  $\mu\text{L}$ ) were sequentially added to 50 mL DI water under vigorous stirring. After 10 min, APS solution (0.5 M, 30 mL) was introduced, and the mixture was magnetically stirred for 3 h to deposit polypyrrole (PPy) onto PS surfaces. The product (denoted as PS@Co-His-PPy) was collected via filtration, washed with DI water/ethanol, and dried at  $80^\circ\text{C}$  under vacuum for 12 h.

Control samples:

PS@Co-PPy: Synthesized identically but without histidine.

PS@PPy: Prepared by omitting both  $\text{Co}(\text{NO}_3)_2$  and histidine.

Thermal Conversion to Single-Atom Catalysts:

The precursors (PS@Co-His-PPy and PS@PPy) were pyrolyzed in a tube furnace at  $700^\circ\text{C}$  ( $5^\circ\text{C}\cdot\text{min}^{-1}$ , Ar flow) for 2 h. After cooling to room temperature, the resulting materials (Co-SAs/NHC and NHC, respectively) were directly collected for use.

Generalization to other metals: Analogous M-SAs/NHC catalysts (M = V, Cr, Mn, Fe, Ni, Cu, Zn, Bi, Ca, Mg) were synthesized by substituting  $\text{Co}(\text{NO}_3)_2 \cdot 6\text{H}_2\text{O}$  with equimolar  $\text{VOSO}_4$ ,  $\text{Cr}(\text{NO}_3)_3 \cdot 9\text{H}_2\text{O}$ ,  $\text{MnCl}_2$ ,  $\text{FeSO}_4 \cdot 7\text{H}_2\text{O}$ ,  $\text{Ni}(\text{NO}_3)_2 \cdot 6\text{H}_2\text{O}$ ,  $\text{Cu}(\text{NO}_3)_2 \cdot 3\text{H}_2\text{O}$ ,  $\text{Zn}(\text{NO}_3)_2 \cdot 6\text{H}_2\text{O}$ ,  $\text{Bi}_2(\text{SO}_4)_3$ ,  $\text{CaCl}_2$ , or  $\text{MgCl}_2$ .

#### *Characterization*

The sizes and morphologies were characterized by a field emission scanning electron microscope (FESEM, Gemini SEM 300) and a transmission electron microscope (TEM, JEOL JEM-F200) with energy dispersive spectroscopy (EDS, JED-2300T). The high resolution and elemental mappings were obtained on a JEOL JEM-2100F at 200 kV. Atomic dispersion and imaging were measured by using a TEM (FEI Spectra 300) at 200 keV, equipped with a probe spherical aberration corrector. The crystalline structure and phase purity were recorded on a Powder X-ray diffraction (XRD) (Philips X'pert PRO with nickel-filtered  $\text{Cu K}\alpha$  radiation ( $\lambda = 1.5406 \text{ \AA}$ )). X-ray photoelectron spectroscopic was used to assess the chemical composition and environment (XPS, Thermo Scientific K-Alpha) using  $\text{Al K}\alpha$  source ( $h\nu = 1486.6 \text{ eV}$ ). The X-ray absorption spectra (XAS) including X-ray absorption near-edge structure (XANES) and extended X-ray absorption fine structure (EXAFS) of the sample at Co K-edge was collected at the Beamline of TLS07A1 in National Synchrotron Radiation Research Center (NSRRC), Taiwan. Co foil,  $\text{CoO}$ , and  $\text{Co}_3\text{O}_4$  served as references and were conducted.

#### *XAFS measurements and data analysis details*

Data reduction, data analysis, and EXAFS fitting were performed and analyzed with the Athena and Artemis programs of the Demeter data analysis packages that utilizes the FEFF6 program to fit the EXAFS data. The energy calibration of the sample was conducted through a standard Fe foil which as a reference was simultaneously measured. A linear function was subtracted from the pre-edge region, then the edge jump was normalized using Athena software. The  $\chi(k)$  data were isolated by subtracting a smooth, three-stage polynomial approximating the absorption background of an isolated atom. The  $k^2$ -weighted  $\chi(k)$  data were Fourier transformed after applying a Kaiser-Bessel window function ( $\Delta k = 1.0$ ). For EXAFS modeling, the global amplitude EXAFS ( $\text{CN}$ ,  $R$ ,  $\sigma^2$  and  $\Delta E_0$ ) were obtained by nonlinear fitting, with least-squares refinement, of the EXAFS equation to the Fourier-transformed data in R-space, using Artemis software. EXAFS of the Fe foil is fitted and the obtained amplitude reduction factor  $S_0^2$  value (0.701) was set in the

EXAFS analysis to determine the coordination numbers (CNs) in the Co–O/N scattering path in sample.

#### *Wavelet Transform analysis*

For Wavelet Transform analysis, the  $\chi(k)$  exported from Athena was imported into the Hama Fortran code. The parameters were listed as follow: R range, 0 - 6.0 Å, k range, 0 - 12.0 Å<sup>-1</sup> for Co-SAs/NHC (0-12.0 Å<sup>-1</sup> for foil, CoO, Co<sub>3</sub>O<sub>4</sub>); k weight, 2; and Morlet function with  $\kappa=10$ ,  $\sigma=1$  was used as the mother wavelet to provide the overall distribution.

#### *Zinc–air batteries test*

The practical performance of the Co-SAs/NHC catalyst was evaluated using a custom-built electrochemical workstation (OMS-T4, Changsha Spring New Energy Technology Co., China). Galvanostatic charge-discharge cycling experiments were performed using a LAND CT2001A battery analyzer (Wuhan Land Electronic Co., China). For cathode preparation, hydrophobic carbon paper (2 cm × 2 cm) served as the substrate. Uniform deposition of either Co-SAs/NHC ink or commercial Pt/C ink (containing equivalent RuO<sub>2</sub> content) was achieved via spray-coating, maintaining a catalyst deposition density of 1.5 ± 0.1 mg cm<sup>-2</sup>. A pristine Zn foil anode was paired with an alkaline electrolyte system containing 6 M KOH and 0.2 M zinc acetate, while a Whatman GF/C glass fiber separator completed the cell configuration.

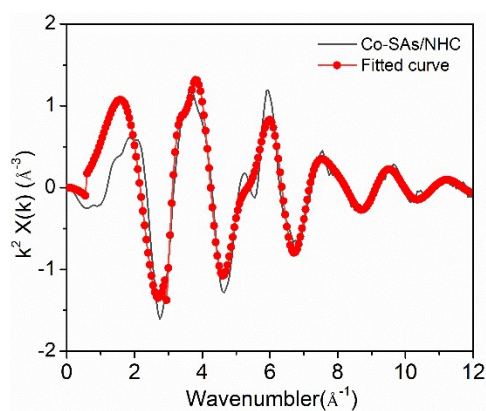

**Figure S1.** The k-space fitted curves of Co-SAs/NHC.

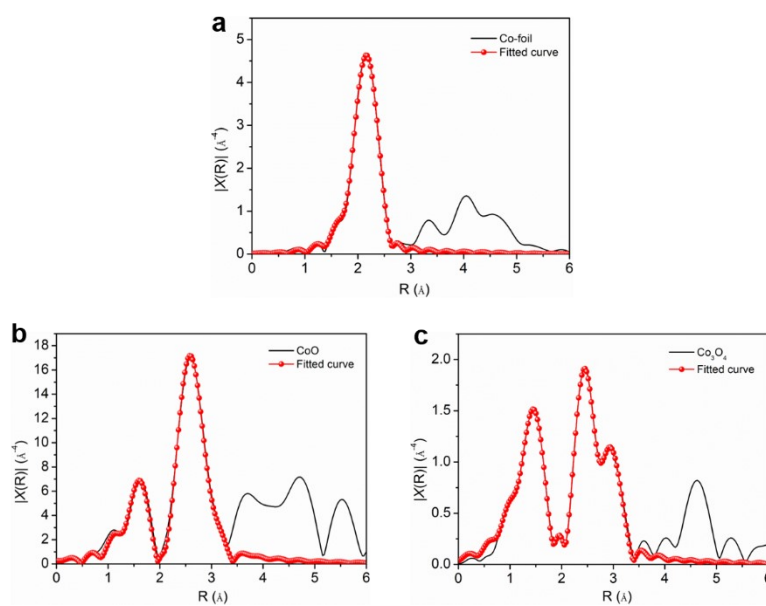

**Figure S2.** (a-c) The extended X-ray absorption fine structure (EXAFS) R space fitting curves of Co foil, CoO, and Co<sub>3</sub>O<sub>4</sub>, respectively.

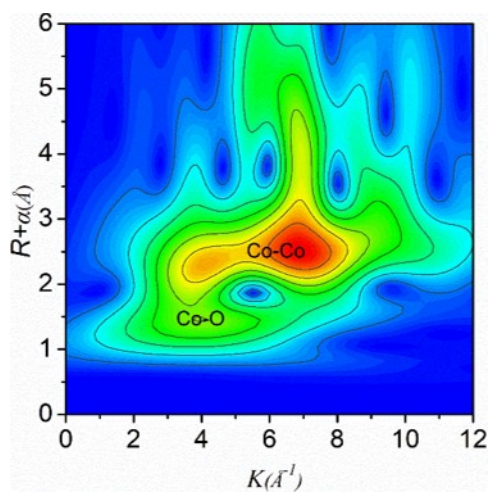

**Figure S3.** Wavelet transform (WT) of CoO.

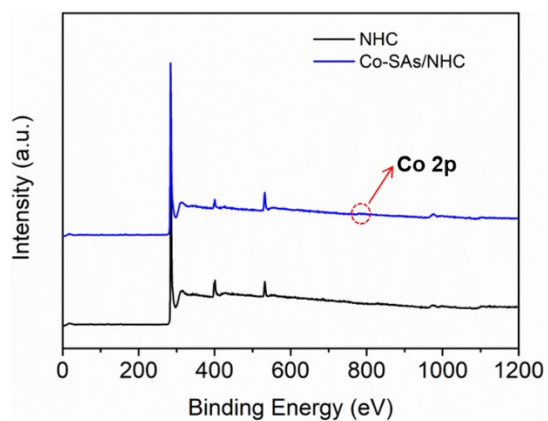

**Figure S4.** XPS survey spectra of NHC and Co-SAs/NHC.

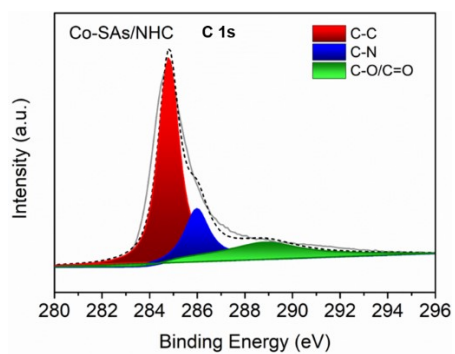

**Figure S5.** High-resolution C 1s XPS spectra of Co-SAs/NHC.

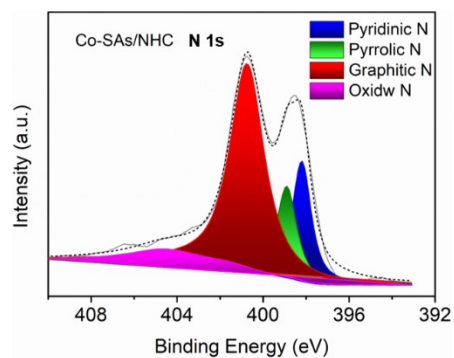

**Figure S6.** High-resolution N 1s XPS spectra of Co-SAs/NHC.

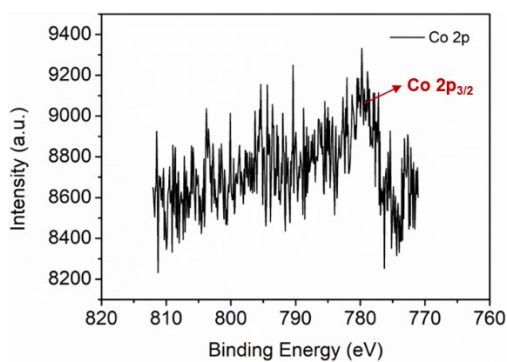

**Figure S7.** High-resolution Co 2p XPS spectrum of Co-SAs/NHC.

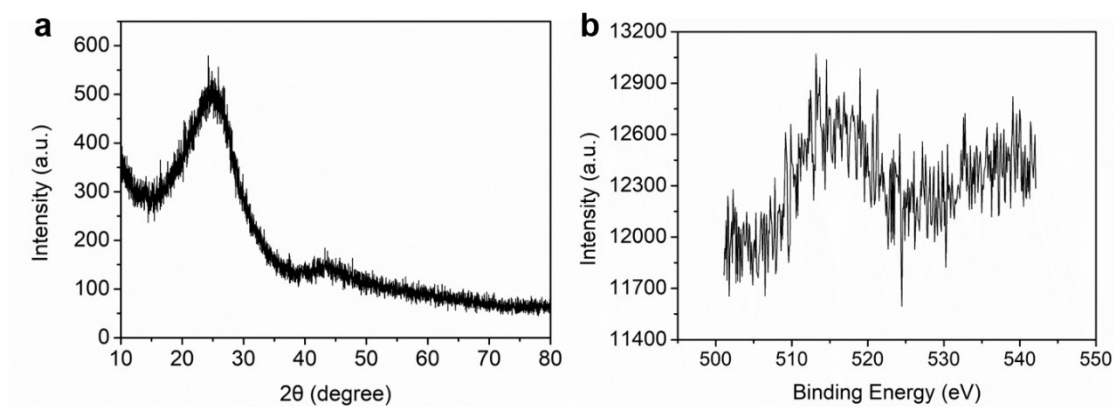

**Figure S8.** a XRD pattern and b High-resolution V 2p XPS spectrum of V-SAs/NHC.

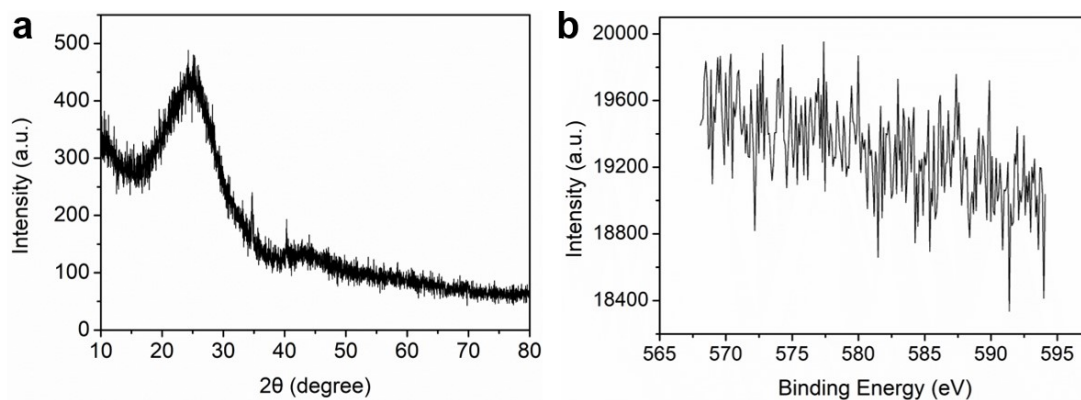

**Figure S9.** a XRD pattern and b High-resolution Cr 2p XPS spectrum of Cr-SAs/NHC.

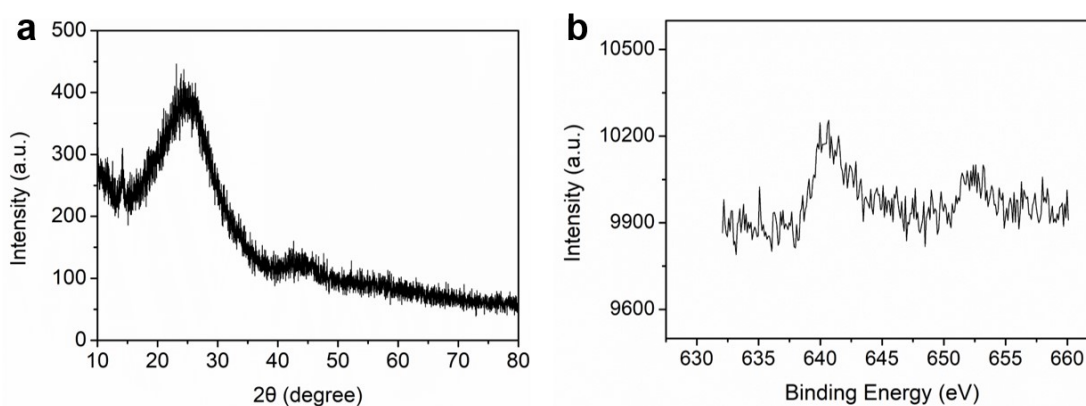

**Figure S10.** a XRD pattern and b High-resolution Mn 2p XPS spectrum of Mn-SAs/NHC.

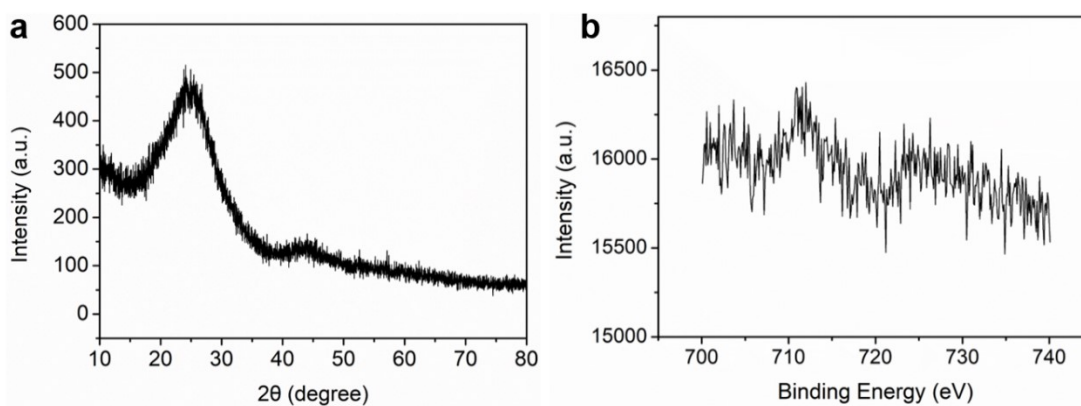

**Figure S11.** a XRD pattern and b High-resolution Fe 2p XPS spectrum of Fe-SAs/NHC.



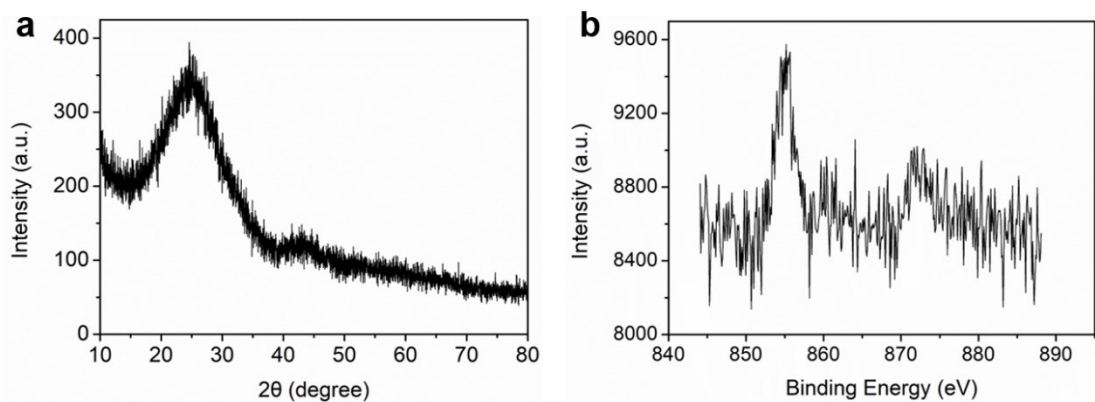

**Figure S12.** a XRD pattern and b High-resolution Ni 2p XPS spectrum of Ni-SAs/NHC.

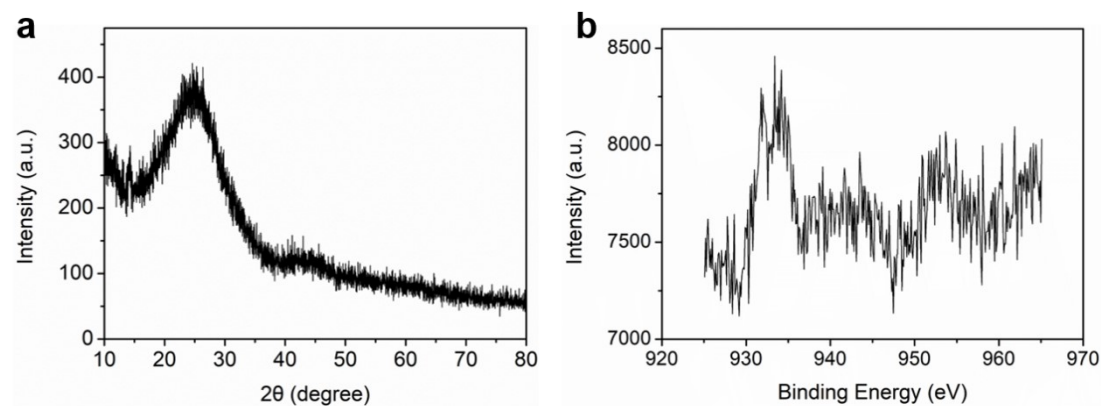

**Figure S13.** a XRD pattern and b High-resolution Cu 2p XPS spectrum of Cu-SAs/NHC.

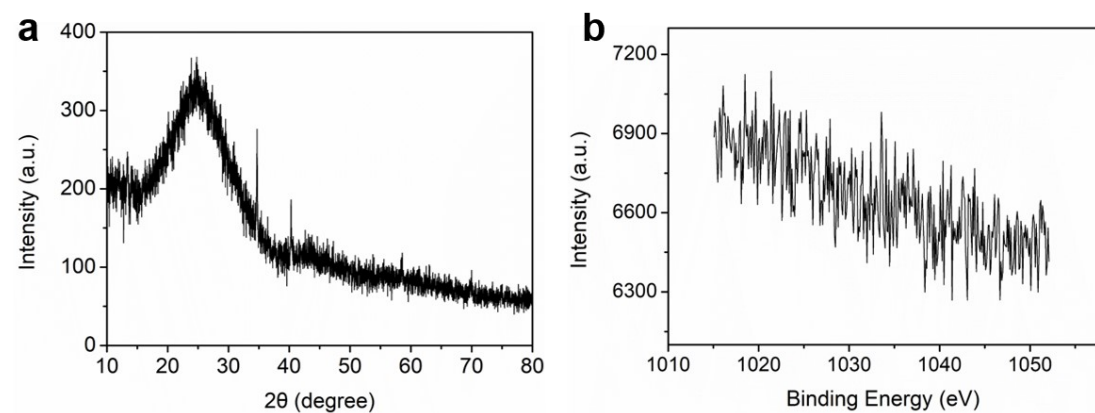

**Figure S14.** a XRD pattern and b High-resolution Zn 2p XPS spectrum of Zn-SAs/NHC.

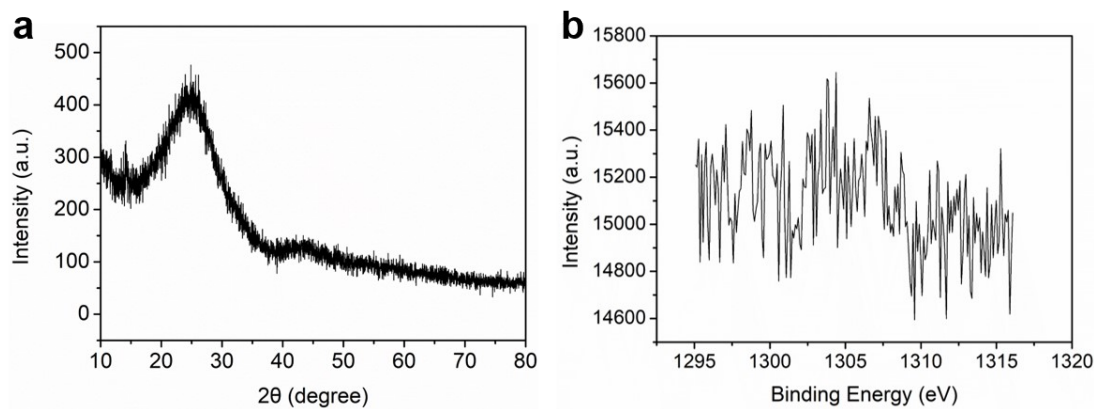

**Figure S15.** a XRD pattern and b High-resolution Mg 2p XPS spectrum of Mg-SAs/NHC.

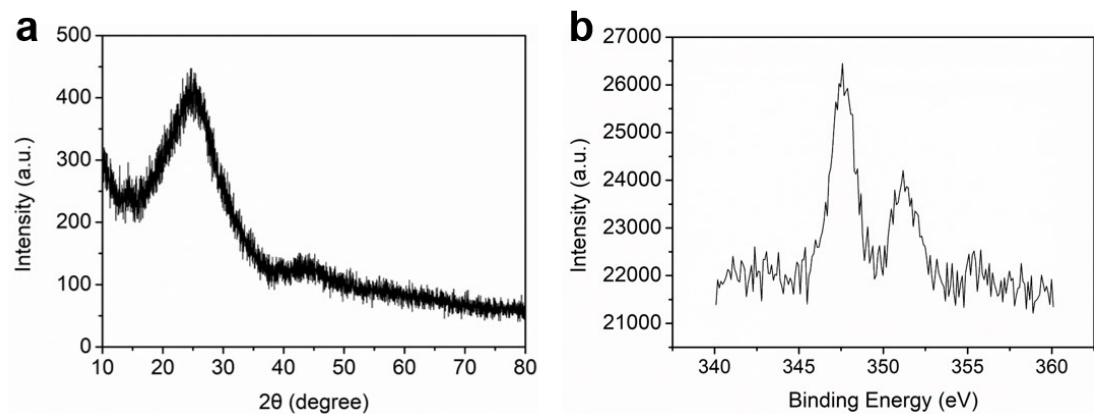

**Figure S16.** a XRD pattern and b High-resolution Ca 2p XPS spectrum of Ca-SAs/NHC.

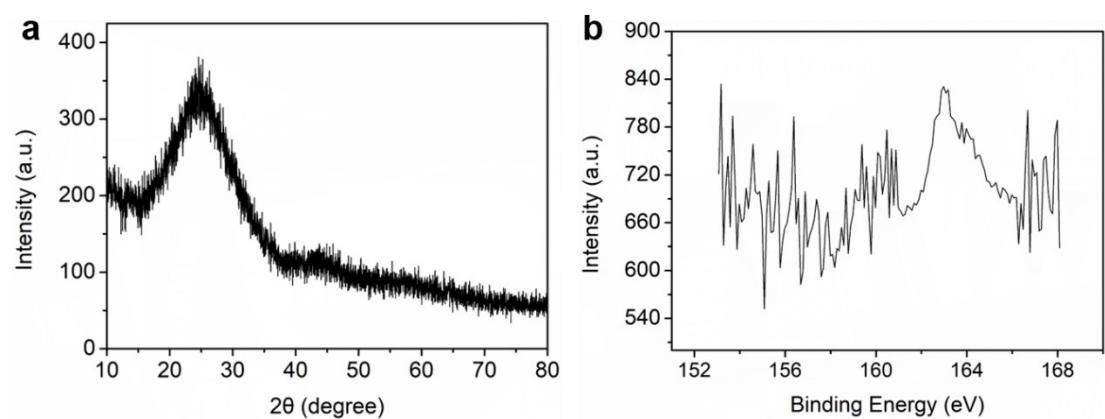

**Figure S17.** a XRD pattern and b High-resolution Bi 4f XPS spectrum of Bi-SAs/NHC.

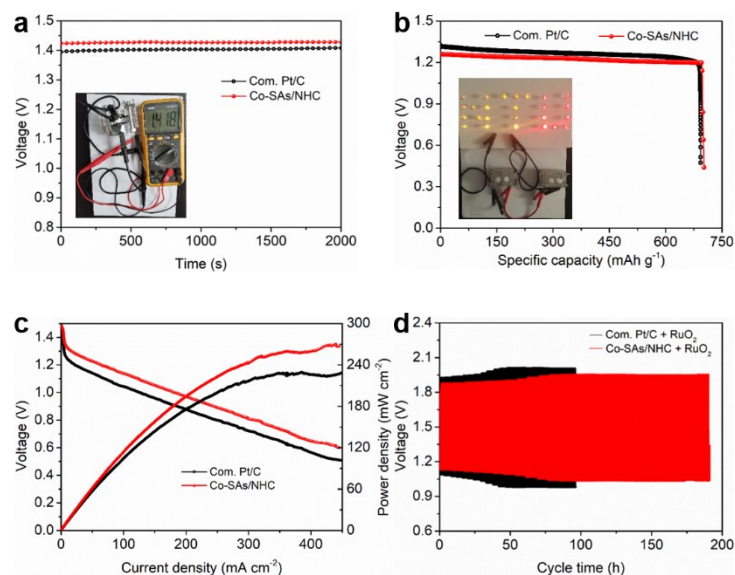

**Figure S18.** (a) Open-circuit voltage of Co-SAs/NHC- and Com. Pt/C-based Zn-air batteries (ZABs). Inset: Photograph of Co-SAs/NHC-based ZAB. (b) Discharging polarization plots of Co-SAs/NHC- and Com. Pt/C-based ZABs with a current density of  $10 \text{ mA cm}^{-2}$ . Inset: Photograph of 25 parallel-connected LEDs powered by 2 serially connected Co-SAs/NHC-based ZABs. (c) The corresponding power density profiles of the above mentioned two ZIBs. (d) Discharge-charge cycling curves of the Co-SAs/NHC assembled and Com. Pt/C assembled ZABs, and the charging and discharging time is set to 5 minutes.

**Table S1.** EXAFS fitting parameters at the Co K-edge for various samples ( $S_0^2=0.80$ ).

| Sample                         | Shell | $CN^a$   | $R(\text{\AA})^b$ | $\sigma^2(\text{\AA}^2)^c$ | $\Delta E_0(\text{eV})^d$ | $R$ factor |
|--------------------------------|-------|----------|-------------------|----------------------------|---------------------------|------------|
| <i>Co K-edge</i>               |       |          |                   |                            |                           |            |
| Co foil                        | Co-Co | 12*      | 2.49±0.01         | 0.0028                     | 8.2                       | 0.002      |
| CoO                            | Co-O  | 6.0±0.1  | 2.11±0.01         | 0.0083                     | 6.2                       | 0.006      |
|                                | Co-Co | 12.0±0.1 | 3.00±0.01         | 0.0083                     | 5.9                       |            |
| Co <sub>3</sub> O <sub>4</sub> | Co-O  | 6.0±0.1  | 1.92±0.01         | 0.0026                     | 4.6                       | 0.005      |
|                                | Co-Co | 6.0±0.1  | 3.08±0.01         | 0.0069                     | 8.5                       |            |
|                                | Co-N  | 3.1±0.1  | 1.96±0.01         | 0.0079                     | 7.9                       |            |
| Co-SAs/NHC                     | Co-O  | 1.1±0.1  | 2.08±0.01         | 0.0031                     | 4.1                       | 0.006      |
|                                | Co-N  | 3.2±0.1  | 2.10±0.01         | 0.0037                     | 5.0                       |            |

Note: <sup>a</sup> $CN$ , coordination number; <sup>b</sup> $R$ , distance between absorber and backscatter atoms; <sup>c</sup> $\sigma^2$ , Debye-Waller factor to account for both thermal and structural disorders; <sup>d</sup> $\Delta E_0$ , inner potential correction;  $R$  factor indicates the goodness of the fit.  $S_0^2$  was fixed to 0.80, according to the experimental EXAFS fit of Co foil by fixing  $CN$  as the known crystallographic value. Fitting range:  $3.0 \leq k (\text{\AA}^{-1}) \leq 12.0$  and  $1.0 \leq R (\text{\AA}) \leq 3.0$  (Co foil);  $3.0 \leq k (\text{\AA}^{-1}) \leq 12.0$  and  $1.0 \leq R (\text{\AA}) \leq \sim 3.0$  (Co-SAs/NHC, Co, CoO, Co<sub>3</sub>O<sub>4</sub>). A reasonable range of EXAFS fitting parameters:  $0.700 < S_0^2 < 1.000$ ;  $CN > 0$ ;  $\sigma^2 > 0 \text{ \AA}^2$ ;  $\Delta E_0 < 10 \text{ eV}$ ;  $R \text{ factor} < 0.02$ .

\* This value was fixed during EXAFS fitting, based on the known structure.

**Table S2.** The metals content of various SACs measured by ICP-AES analysis.

| Catalyst   | Metal content (wt%) |
|------------|---------------------|
| V-SAs/NHC  | 5.6                 |
| Cr-SAs/NHC | 4.7                 |
| Mn-SAs/NHC | 5.9                 |
| Fe-SAs/NHC | 9.3                 |
| Ni-SAs/NHC | 8.2                 |
| Cu-SAs/NHC | 7.6                 |
| Zn-SAs/NHC | 6.6                 |
| Mg-SAs/NHC | 4.8                 |
| Ca-SAs/NHC | 4.5                 |
| Bi-SAs/NHC | 4.6                 |
